# Supplementary material
Source: PubMed Central journal article supplement (PMC4937992)

Supplementary Figure 2: LFP responses to the reward cue.

A Average time-frequency response

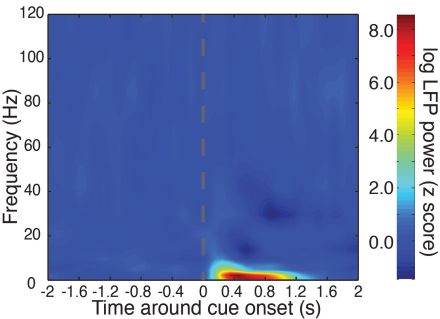

B

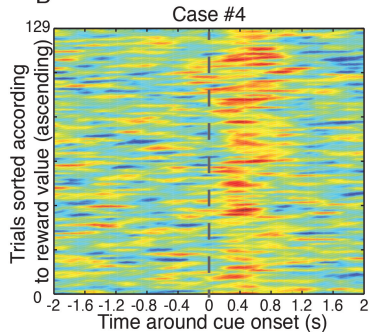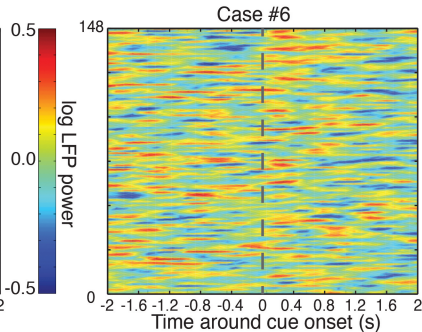

Supplement: NIHMS69068-supplement-Suppl5.pdf [file NIHMS69068-supplement-Suppl5.pdf]

Supplementary Figure 3: LFP responses to the effort cue.

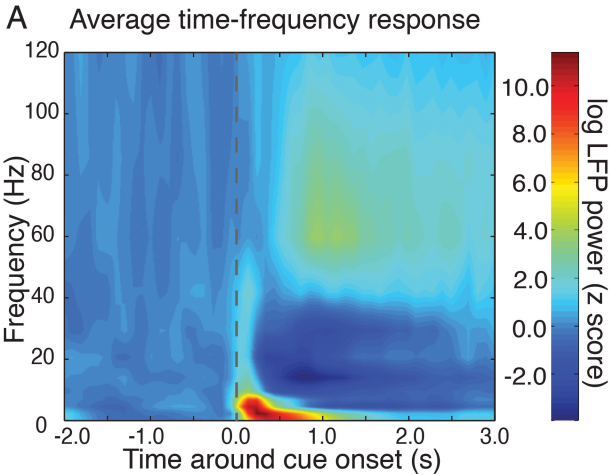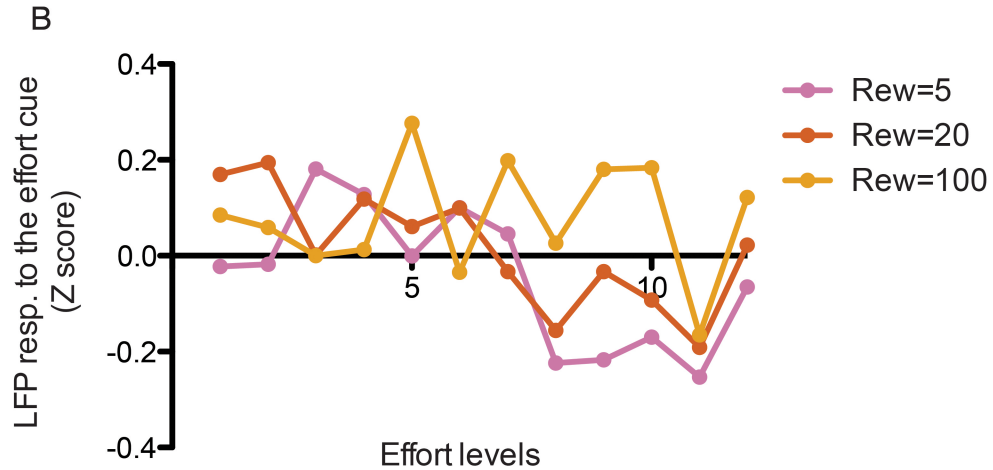

Supplement: NIHMS69068-supplement-Suppl6.pdf [file NIHMS69068-supplement-Suppl6.pdf]

Supplementary Figure 4: LFP responses in the control task.

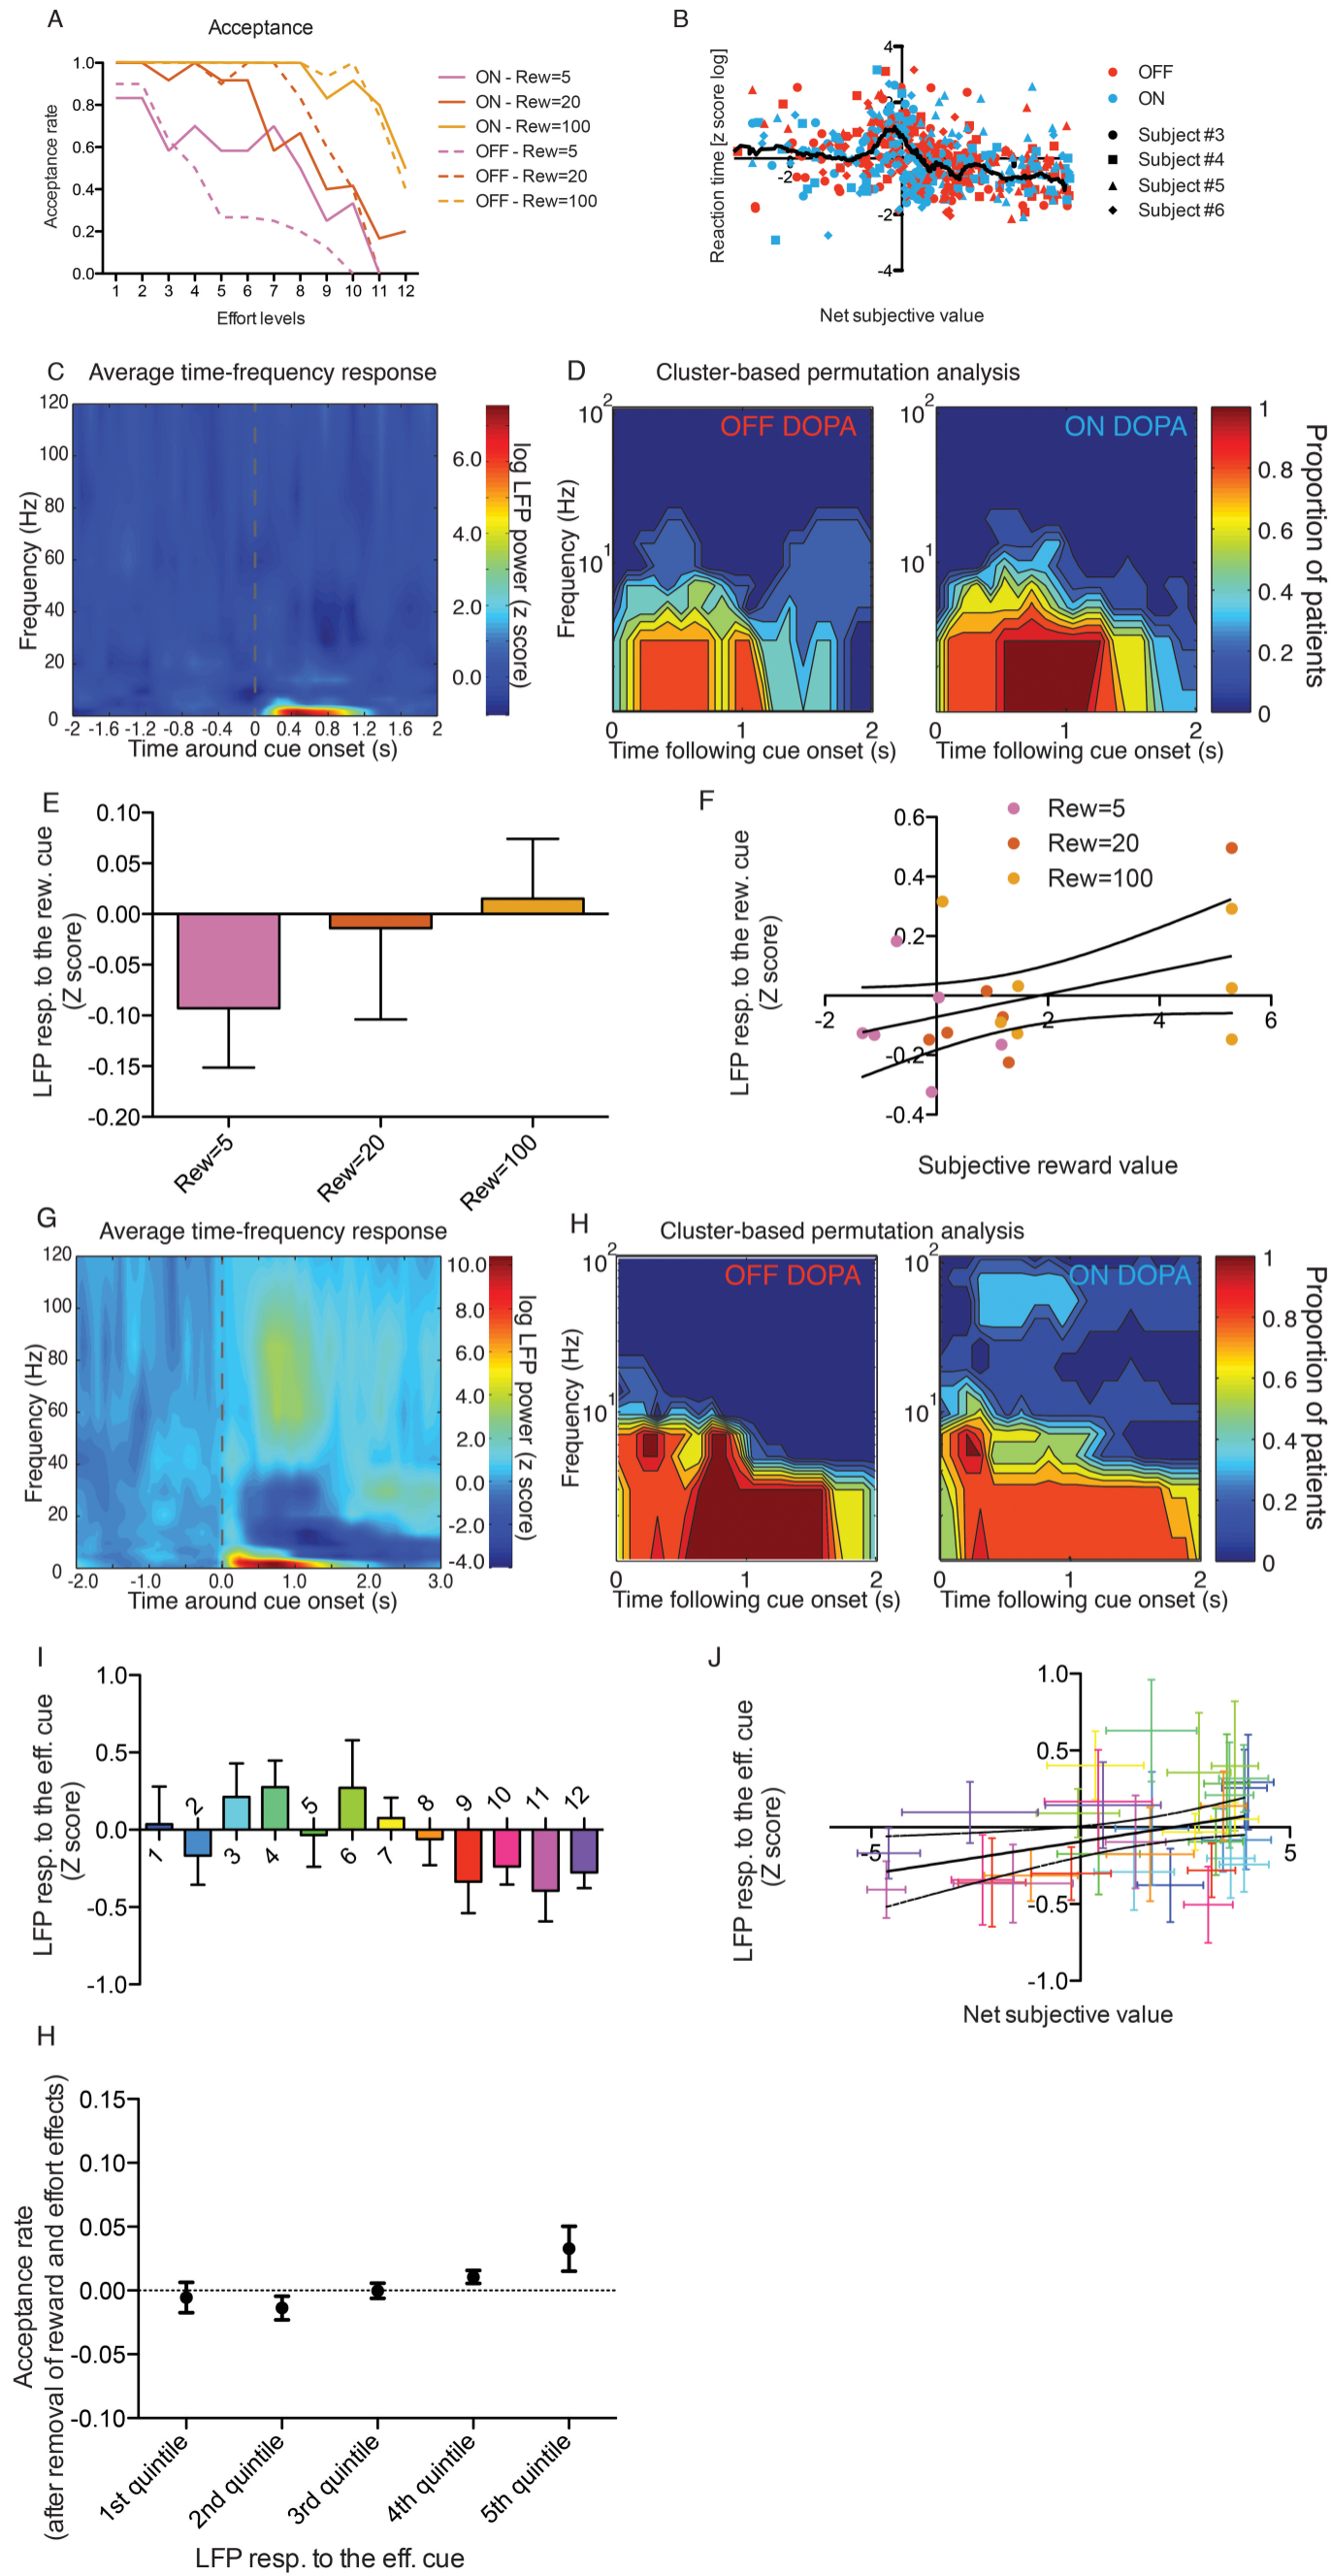

Supplement: NIHMS69068-supplement-Suppl7.pdf [file NIHMS69068-supplement-Suppl7.pdf]
